# Supplementary material
Source: PubMed Central journal article supplement (PMC7335776)
Supplement: supp_RA120.013994_160319_2_supp_532455_qrjm82.pdf [file supp_RA120.013994_160319_2_supp_532455_qrjm82.pdf]

**Table S1: Plasmids and *Streptomyces coelicolor* and *Escherichia coli* strains**

| Strain or plasmid                                   | Genotype, characteristic(s) and/or use                                | Reference or source |
|-----------------------------------------------------|-----------------------------------------------------------------------|---------------------|
| <b><i>Streptomyces coelicolor</i> A3(2) strains</b> |                                                                       |                     |
| M145                                                | SCP1 <sup>-</sup> SCP2 <sup>-</sup>                                   | (1)                 |
| E117                                                | $\Delta rpfA-E$ ( <i>rpf</i> null)                                    | (2)                 |
| J3385                                               | 3 $\times\Delta$ PASTA                                                | (3)                 |
| <b><i>Escherichia coli</i> strains</b>              |                                                                       |                     |
| DH5 $\alpha$                                        | Routine cloning                                                       |                     |
| ET12567(pUZ8002)                                    | <i>dam dcm</i> ; with transmobilizing plasmid pUZ8002                 | (4,5)               |
| Rosetta 2                                           | Protein overexpression                                                | Novagen             |
| <b>Plasmids</b>                                     |                                                                       |                     |
| pET15b                                              | Overexpression of His <sub>6</sub> tagged proteins                    | Novagen             |
| pMC177                                              | pET15b carrying <i>rpfA</i>                                           | (6)                 |
| pMC200                                              | pET15b carrying <i>rpfA</i> $\Delta$ <i>LysM</i>                      | This study          |
| pMC178                                              | pET15b carrying <i>rpfB</i>                                           | (2)                 |
| pMC179                                              | pET15b carrying <i>rpfC</i>                                           | (2)                 |
| pMC181                                              | pET15b carrying <i>rpfD</i>                                           | (2)                 |
| pMC201                                              | pET15b carrying <i>rpfD</i> $\Delta$ <i>LytM</i> $\Delta$ <i>LysM</i> | This study          |
| pMC202                                              | pET15b carrying <i>rpfD</i> $\Delta$ <i>LysM</i>                      | This study          |
| pMC203                                              | pET15b carrying <i>rpfD</i> $\Delta$ <i>LytM</i>                      | This study          |
| pMC182                                              | pET15b carrying <i>rpfE</i>                                           | (2)                 |

**Table S2: Oligonucleotides used in this study**

| <b>Primer Name</b>  | <b>Sequence (5'- 3')<sup>1</sup></b>       | <b>Use</b>                       |
|---------------------|--------------------------------------------|----------------------------------|
| 0974 PP 5'          | CAGTACC <u>CATATGGCCGACGCGC</u> GACCTGGGAC | Overexpression of RpfD           |
| 0974 PP 3'          | CAGTACGGATCCTCAGATCCTGACGCGCCGGC           | Overexpression of RpfD           |
| 0974ΔlytM PP 3'     | CATCATGGATCCCGGGTGGTCCCCTGCCCGC            | Overexpression of RpfDΔLytM      |
| SCO0974ΔlysM rev    | TGCTCTTGCTTCTGCTCTTTCAGTCCGGCCCGCTCCGAGCA  | RpfDΔLysM overexpression         |
| SCO0974ΔlysM fwd    | AAAGAGCAGAAGCAAGAGCA                       | RpfDΔLysM overexpression         |
| 0974ΔlytMΔlysM PP3' | CATCATGGATCCTCCGGCCCGCTCCGAGCACA           | Overexpression of RpfDΔLytMΔLysM |
| 3097 PP 5'          | CAGTACC <u>CATATGGCCACCGCGT</u> CCG        | Overexpression of RpfA           |
| 3097 PP 3'          | CGAAGTGGATCCTTACTTCAGGTGCAGCTGCTG          | Overexpression of RpfA           |
| 3097ΔlysM PP 3'     | CATCATGGATCCTCAGCCGGTGCCGCA                | Overexpression of RpfAΔLysM      |
| T7 promoter         | TAATACGACTCACTATAGGG                       | Sequencing                       |
| T7 terminator       | GCTAGTTATTGCTCAGCGG                        | Sequencing                       |

<sup>1</sup>Restriction enzyme sites are underlined

**Table S3: Conditions for protein overexpression**

|                | Induction<br>OD <sub>600</sub> | [IPTG]<br>(mM) | Induction time<br>(hr) | Induction<br>temperature (°C) | Molecular<br>weight (kDa) <sup>1</sup> |
|----------------|--------------------------------|----------------|------------------------|-------------------------------|----------------------------------------|
| RpfA           | 0.8                            | 1              | 2.5                    | 30                            | 22.8                                   |
| RpfAΔLysM      | 0.6                            | 1              | 2.5                    | 30                            | 10.0                                   |
| RpfB           | 0.8                            | 0.25           | 16                     | 16                            | 36.6                                   |
| RpfC           | 0.8                            | 1              | 16                     | 16                            | 40.0                                   |
| RpfD           | 0.8                            | 1              | 4.5                    | 30                            | 42.6                                   |
| RpfDΔLysM      | 0.8                            | 1              | 16                     | 16                            | 30.3                                   |
| RpfDΔLysMΔLytM | 0.8                            | 1              | 2.5                    | 30                            | 10.9                                   |
| RpfE           | 0.8                            | 1              | 2.5                    | 30                            | 10.2                                   |

<sup>1</sup> Calculated without the SignalP predicted signal peptide and with the 6×His tag

|      |                                                                                                          |    |
|------|----------------------------------------------------------------------------------------------------------|----|
| NlpD | -NKGID <sup>■</sup> IAGSKGQAI IATADGRVVYAGNALRG-YGNLII IKHND <sup>■</sup> DYLSAYAHND <sup>■</sup> TMLVRE | 58 |
| RpfD | -HTGVDFPVPTGTSVKS <sup>■</sup> VADGRVVSAGWGGSYGYQV-V-VRHGDGRYSQYAHLSAISVKS                               | 57 |
| LytM | AHYGV <sup>■</sup> DYAMPENSPVYSLTDGTVVQAGWSNYGGGNQVTIKEANSNNYQWYMHNNRLTVSA                               | 60 |
|      | . *:*                    : : : ** ** * .                    . .                    . * * . : *           |    |
|      |                                                                                                          |    |
| NlpD | QQEVKAGQKIATMGSTGTSS-TRLHFEIRYK <sup>■</sup> GKSV-----                                                   | 92 |
| RpfD | GQSVGVQRLGRSGSTGNVTGPHLHFEV <sup>■</sup> RTGPGFGSDVDP                                                    | 97 |
| LytM | GDKVKAGDQIAYS <sup>■</sup> SGSTGNSTAPHVHFQ <sup>■</sup> RMSGG-----                                       | 92 |
|      | :. * . * : : .        * * * * . :        : : * * :                                                       |    |

**Figure S1: Catalytic residues in the LytM domain of *S. aureus* LytM are conserved in RpfD.** Alignment of the amino acid sequence of LytM domains from *Escherichia coli* NlpD, *Staphylococcus aureus* LytM, and *Streptomyces coelicolor* RpfD, using Clustal Omega. LytM catalytic residues are highlighted in grey. Asterisks denote residues that are conserved, colons denote conservation of residues with strongly similar properties, and periods denote conservation of residues with weakly similar properties at a specific position.

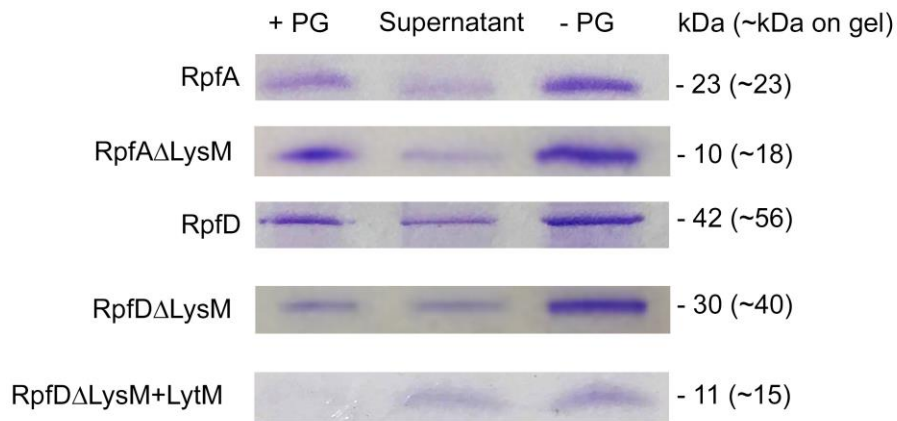

**Figure S2: Peptidoglycan binding assays for RpfA and RpfD variants.** Peptidoglycan binding by the different Rpf proteins was assessed by incubating approximately two nanomoles of each Rpf protein with peptidoglycan isolated from *Streptomyces coelicolor*. Following separation of bound (+PG, left) and unbound (Supernatant, centre) protein by centrifugation, the fractionated samples were separated on a tricine polyacrylamide gel (PAG) and stained using Coomassie Brilliant Blue. -PG (right) = input protein (positive control). Protein molecular weight is shown on the far right (kDa), with molecular weight relative to protein marker after separation on a PAG, shown in brackets (~kDa on gel).

## REFERENCES

1. Kieser, T., Bibb, M. J., Buttner, M. J., Chater, K. F., and Hopwood, D. A. (2000) *Practical Streptomyces Genetics*, Norwich, U.K.
2. Sexton, D. L., St-Onge, R. J., Haiser, H. J., Yousef, M. R., Brady, L., Gao, C., Leonard, J., and Elliot, M. A. (2015) Resuscitation-promoting factors are cell wall-lytic enzymes with important roles in the germination and growth of *Streptomyces coelicolor*. *J. Bacteriol.* **197**, 848–860
3. Hempel, A. M., Cantlay, S., Molle, V., Wang, S.-B., Naldrett, M. J., Parker, J. L., Richards, D. M., Jung, Y.-G., Buttner, M. J., and Flärdh, K. (2012) The Ser/Thr protein kinase AfsK regulates polar growth and hyphal branching in the filamentous bacteria *Streptomyces*. *Proc. Natl. Acad. Sci. U.S.A.* **109**, E2371–9
4. MacNeil, D. J., Gewain, K. M., Ruby, C. L., Dezeny, G., Gibbons, P. H., and MacNeil T. (1992) Analysis of *Streptomyces avermitilis* genes required for avermectin biosynthesis utilizing a novel integration vector. *Gene.* **111**, 61-68
5. Paget, M. S. B., Chamberlin, L., Atrih, A., Foster, S. J., and Buttner, M. J. (1999) Evidence that the extracytoplasmic function sigma factor SigE is required for normal cell wall structure in *Streptomyces coelicolor* A3(2). *J. Bacteriol.* **181**, 204-211.
6. Haiser, H. J., Yousef, M. R., and Elliot, M. A. (2009) Cell wall hydrolases affect germination, vegetative growth, and sporulation in *Streptomyces coelicolor*. *J. Bacteriol.* **191**, 6501–6512
